# Supplementary material for: Periodontitis, dental plaque, and atrial fibrillation in the Hamburg City Health Study
Source: PubMed Central journal article supplement (PMC8608306; doi:10.1371/journal.pone.0259652), 2021-11-22
Supplement: pone.0259652.s001.pdf [file pone.0259652.s001.pdf]

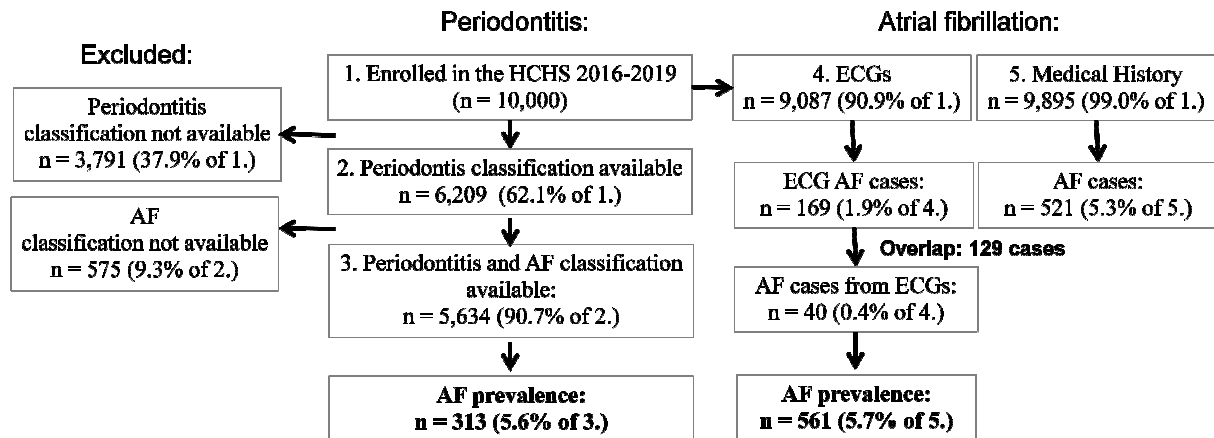

**S1 Fig. Sampling chart.** 9,087 ECGs, 9,895 medical histories, and 6,209 full-mouth periodontal examinations were evaluated for the study. Included were 5,634 participants with complete PD and AF classification data. The AF prevalence was 5.6% in the subgroup with complete data compared to 5.7% in the subgroup with AF data. Of 169 AF cases, which were identified by ECG, 129 cases (75%) had a positive medical history of AF.
